# Supplementary material for: Detection of novel fusion-transcripts by RNA-Seq in T-cell lymphoblastic lymphoma
Source: PubMed Central journal article supplement (PMC6435891; doi:10.1038/s41598-019-41675-3), 2019-03-26

## Supporting Information

### Detection of novel fusion-transcripts by RNA-Seq in T-cell lymphoblastic lymphoma

Pilar López-Nieva<sup>1,2,3</sup>, Pablo Fernandez-Navarro<sup>4,5</sup>, Osvaldo Graña-Castro<sup>6</sup>, Eduardo Andrés-León<sup>7</sup>, Javier Santos<sup>1,2,3</sup>, María Villa-Morales<sup>1,2,3</sup>, María Ángeles Cobos-Fernandez<sup>1,2,3</sup>, Laura Gonzalez-Sánchez<sup>1,2,3</sup>, Marcos Malumbres<sup>8</sup>, María Salazar-Roa<sup>8</sup>, and José Fernández-Piqueras<sup>1,2,3\*</sup>.

<sup>1</sup> Department of Cellular Biology and Immunology. Severo Ochoa Molecular Biology Center (CBMSO). CSIC-Madrid Autonomous University. Madrid. Spain. <sup>2</sup> Institute of Health Research Jiménez Díaz Foundation. Madrid. Spain; <sup>3</sup> Consortium for Biomedical Research in Rare Diseases (CIBERER), Spain. Carlos III Institute of Health. Madrid. Spain; <sup>4</sup> Cancer and Environmental Epidemiology Unit, National Center for Epidemiology, Carlos III Institute of Health. Madrid. Spain; <sup>5</sup> Consortium for Biomedical Research in Epidemiology and Public Health (CIBERESP), Spain; <sup>6</sup> Bioinformatics Unit, Structural Biology and Biocomputing Programme, Spanish National Cancer Research Center (CNIO), Spain; <sup>7</sup> Bioinformatics Unit, Instituto de Parasitología y Biomedicina "López-Neyra", Consejo Superior de Investigaciones Científicas (IPBLN-CSIC), PTS Granada, Granada, 18016, Spain; <sup>8</sup> Cell Division and Cancer Group, Molecular Oncology Programme, Spanish National Cancer Research Centre (CNIO), Spain; PLN, PFN, OG and EAL. contributed equally to this work

\* To whom correspondence should be addressed. Phone: +34-911964653 Fax: +34-911964420; Email: jfpiqueras@cbm.csic.es

#### Table of Contents:

|    |                                                    |                     |
|----|----------------------------------------------------|---------------------|
| 1. | <b>Bioinformatic tools and arguments used</b>      |                     |
| 2. | <b>Legends of Supplementary Tables and Figures</b> |                     |
| 3. | <b>Supplementary Table</b>                         | <b>S1</b>           |
| 4. | <b>Supplementary Table</b>                         | <b>S4</b>           |
| 5. | <b>Supplementary Table</b>                         | <b>S5</b>           |
| 6. | <b>Supplementary Table</b>                         | <b>S7</b>           |
| 7. | <b>Supplementary Figure</b>                        | <b>S1 (A and B)</b> |
| 8. | <b>Supplementary Figure</b>                        | <b>S2</b>           |

## **1.- Bioinformatic tools and arguments used**

### **(1) Quality check with FastQC**

```
perl /SOFTWARE/FastQC_v0.10.1/fastqc -o outputDir --noextract <input Fastq>
```

### **(2) Trimming of 76bp reads to 50bp with seqtk (Version: 1.0-r45)**

```
/SOFTWARE/seqtk/seqtk-master/seqtk trimfq -b 0 -e 26 <input Fastq>
```

### **(3) Alignment of reads with Tophat 2.0.10, using Bowtie 1.0.0 and Samtools 0.1.19**

```
export PATH=$PATH:/SOFTWARE/bowtie-1.0.0:/SOFTWARE/samtools-0.1.19/
```

```
/SOFTWARE/TopHat/tophat-2.0.10.Linux_x86_64/tophat --bowtie1 -p 4 --read-edit-dist 2 --read-gap-length 2 --GTF Homo_sapiens.GRCh37.74.gtf --no-coverage-search --max-multihits 5 --mate-inner-dist 10 --mate-std-dev 80 --fusion-search --library-type fr-firststrand --read-mismatches 2 --segment-mismatches 1 --segment-length 20 --splice-mismatches 0 -o outputDir  
/REFERENCES/Homo_sapiens/UCSC/hg19/Sequence/BowtieIndex/genome  
<sample_R1.fastq> <sample_R2.fastq>
```

\*\*The genome fasta file (UCSC.hg19) was downloaded from:  
<https://ccb.jhu.edu/software/tophat/igenomes.shtml>

\*\*The Homo\_sapiens.GRCh37.74.gtf annotation file was downloaded from:  
[ftp://ftp.ensembl.org/pub/release-74/gtf/homo\\_sapiens/Homo\\_sapiens.GRCh37.74.gtf.gz](ftp://ftp.ensembl.org/pub/release-74/gtf/homo_sapiens/Homo_sapiens.GRCh37.74.gtf.gz)

\*\*For those samples where trimming of reads was required to adjust read size, trimmed Fastq files were used as input for Tophat.

### **(4) Quantification of expression with Cufflinks 2.2.1 (cuffquant and cuffnorm)**

```
export PATH=$PATH:/SOFTWARE/samtools-0.1.19:/SOFTWARE/cufflinks-2.2.1.Linux_x86_64/
```

```
cuffquant -p 4 --library-type fr-firststrand --frag-bias-correct  
/REFERENCES/Homo_sapiens/UCSC/hg19/Sequence/BowtieIndex/genome.fa --multi-read-correct --max-bundle-frags 500000 --seed 123L -o outDir  
Homo_sapiens.GRCh37.74.gtf <input.bam>
```

```
cuffnorm -p 4 --library-type fr-firststrand --seed 123L --library-norm-method geometric  
-o outDir --labels <label1,...,labelN> Homo_sapiens.GRCh37.74.gtf <sample1.cxb>..  
<sampleN.cxb>
```

\*\*cxb input files for cuffnorm are previously generated by cuffquant (5) Fusion detection with Tophat-Fusion

### **(5) Fusion detection with Tophat-Fusion**

- Database and annotation files obtained from the authors web page at:  
[https://ccb.jhu.edu/software/tophat/fusion\\_tutorial.shtml](https://ccb.jhu.edu/software/tophat/fusion_tutorial.shtml)

Run fusion detection:

```
export PATH=$PATH:/SOFTWARE/TopHat/tophat-2.0.10.Linux_x86_64/:/SOFTWARE/bowtie-1.0.0/:/SOFTWARE/samtools-0.1.19/:/SOFTWARE/blast/ncbi-blast-2.2.29+/bin:/SOFTWARE/blast/blast-2.2.20/bin;
```

```
tophat-fusion-post -p 4 --num-fusion-reads 1 --num-fusion-pairs 1 --num-fusion-both 0 --fusion-read-mismatches 2 --fusion-multireads 4 /REFERENCES/Homo_sapiens/UCSC/hg19/Sequence/BowtieIndex/genome
```

#### (6) Fusion detection with EricSript

- Database from GRCh37/hg19 obtained from EricSript download page, at <https://sites.google.com/site/bioericscript/download>

Run fusion detection:

```
perl ericscript.pl -p 12 -db EricSript_db/ericscript_db_homosapiens_GRCh37/ --refid homo_sapiens -name <label> -o <output_folder_name> <sample_R1.fastq> <sample_R2.fastq>
```

#### (7) Fusion detection with ChimeraScan

- Get hg19 chromosomes from UCSC:
  - o `rsync -avzP rsync://hgdownload.cse.ucsc.edu/goldenPath/hg19/bigZips/chromFa.tar.gz .`
  - o Uncompress it: `tar -zxvf chromFa.tar.gz`
  - o Concatenate all files in 1: `cat chr1.fa chr2.fa .... chr???.fa > hg19.fa`
- Obtaining transcriptome annotations
  - o Downloading transcriptome annotations from UCSC:

Visit the UCSC Tables page at <http://genome.ucsc.edu/cgi-bin/hgTables?command=start>  
Set the clade, genome, and assembly flags to match the genome you downloaded  
In the group list select "Genes and Gene Prediction Tracks" From the track list select "UCSC Genes" (or another list of your choice)

From output format select "selected fields from primary and related tables"

In the file type returned box enter a file name of your choice  
Click 'get output'. You will be redirected to a second page that allows you to select tables fields to include in the output.

In the upper table (mine reads "Select Fields from hg19.knownGene") select all fields EXCEPT proteinID and alignID.

In the lower table (mine reads "hg19.kgXref fields") select "geneSymbol" and no other fields.

Click 'get output' again. Save the file and note the path.

If you downloaded a compressed (gzipped) transcriptome annotation file, uncompress it as follows:

```
$ gunzip <genes.txt.gz>
```

- Running the chimerascan indexer:

```
python /bin/chimerascan_index.py hg19.fa genes.txt <index_folder>
```

Run fusion detection:

```
chimerascan_run.py <index_folder> <sample_R1.fastq> <sample_R2.fastq>  
<output_folder_name>
```



## 2.- Legends of Supplementary Tables and Figures

**Supplementary Table S1.** - Human primary T-LBLs and control samples provided by Spanish Biobanks.

**Supplementary Table S2.** - Total significant fusion-transcripts identified by using the three methods of detection: *TopHat-Fusion*, *EricScrip* and *ChimeraScan*.

**Supplementary Table S3.** - Accurate details of the characteristics of the 55 selected fusions detected by at least two different detection methods in the same sample. In the columns headed by sample codes (C-M), the letter **t** is the abbreviation of *TopHat-Fusion*, **e** represent *EricScript*, and **c**, *ChimeraScan*. The numbers **0** and **1** indicate negative and positive detections. The presence/absence and topography of each fusion in the Atlas of Genetics and Cytogenetics in Oncology and Haematology (URL <http://AtlasGeneticsOncology.org>) is indicated in the columns V and W.

**Supplementary Table S4.** - Primers list. All primers used in this study. In those instances in which no reference is indicated, primers were our own design using the Primer3 software (<http://frodo.wi.mit.edu/cgi-bin/primer3/>).

**Supplementary Table S5.**- Novel fusions confirmed by Sanger-sequencing. **Positives (grey) and negatives (white), indicating PCR validation of fusion transcripts.** Dark yellow indicate fusions confirmed for all the samples (both tumor and control samples). N.D. Not Done.

**Supplementary Table S6.**- Detailed description of the fusion transcripts identified by the *EricScrip* algorithm, with indication of break points, DNA strands, fusion-type, junction sequences and gene expression data.

**Supplementary Table S7.**- Number of reads sequenced per sample and the overall read mapping rate given by TopHat.

**Supplementary Figure S1.**- Validation of the fusion junction sequences of the novel fusion transcripts by Sanger sequencing. A., Fusions confirmed in all samples. B, fusions confirmed in only a fraction of tumour and control samples. Vertical black-bars indicate the fusion junctions. All validations were performed at the transcript level.

**Supplementary Figure S2.**- The 3'UTR of *JAK3* and *INSL3* with indication of the recognition sites for multiple miRNA according to the TargetScan database ([http://www.targetscan.org/cgi-bin/targetscan/vert\\_71/](http://www.targetscan.org/cgi-bin/targetscan/vert_71/); Vikram Agarwal George W Bell Jin-Wu Nam David P Bartel (2015) Predicting effective microRNA target sites in mammalian mRNAs. eLife 2015;4:e05005 doi: 10.7554/eLife.05005).

**Supplementary Table S1.**

|                  | Sample ID | Type                 | Organ            | Sex    | Age       | % Tumor cells | TdT | Pax5 | CD3  | CD4 | CD8 | CD2 | CD1a | CD34 | CD117 | MPO | Characterization        |                                |
|------------------|-----------|----------------------|------------------|--------|-----------|---------------|-----|------|------|-----|-----|-----|------|------|-------|-----|-------------------------|--------------------------------|
| Discovery Cohort | 840       | Tumor                | Lymph node       | Male   | Pediatric | 70%           | +   |      | ic + | -   | -   | +/- |      | +    | -     | -   | ProT-immature T-LBL     |                                |
|                  | 238       | Tumor                | Lymph node       | Female | Adult     | 80%           | +   | -    | +    | -   | -   | +/- | -    | -    | -     | -   | PreT / Immature T-LBL   |                                |
|                  | 521       | Tumor                | Lymph node       | Male   | Pediatric | 90%           | +   | -    | +/-  | +   | +   | +   | +    | -    | -     | -   | Cortical / Common T-LBL |                                |
|                  | 408       | Tumor                | Lymph node       | Female | Adult     | 80%           | +/- | -    | +/-  | +/- | +/- | +   | +    | -    | -     | -   | -                       | Cortical / Common T-LBL        |
|                  | 192       | Tumor                | Lymph node       | Male   | Adult     | 90%           | +   | -    | +    | +/- | +   | +   | +    | +/-  | -     | +   | -                       | pre-T-Cortical / Common T-LBL  |
|                  | 346       | Tumor                | Mediastinum      | Male   | Adult     | 95%           | +/- | -    | +    | +   | +   | -   | -    | -    | -     | +/- | -                       | Cortical / Common T-LBL        |
|                  | 460       | Tumor                | Lymph node       | Male   | Pediatric | 70%           | +   | -    | +    | -   | +   |     |      |      | -     | -   | Medullar / Mature T-LBL |                                |
|                  | 104       | Tumor                | Lymph node       | Male   | Pediatric |               | +   |      | +    | +/- | +   | +   |      |      |       |     |                         | Cortical / Common T-LBL        |
|                  | 554       | Tumor                | Lymph node       | Female | Adult     | 85%           | +   | -    | +    | +   | +   |     |      | +    | -     | +/- | -                       | T-LBL                          |
|                  | 404       | Control              | Fetal thymus     |        |           |               |     |      |      |     |     |     |      |      |       |     |                         |                                |
| 405              | Control   | Fetal thymus         |                  |        |           |               |     |      |      |     |     |     |      |      |       |     |                         |                                |
| Extended Cohort  | 526       | Tumor                | Mediastinum      | Male   | Pediatric | 70%           | +/- | -    | +/-  | -   |     |     |      |      |       |     | T-LBL                   |                                |
|                  | 829       | Tumor                | Lymph node       | Male   | Adult     | 88%           | +   |      | +    |     |     |     |      | +    |       | +/- | Immature T-LBL          |                                |
|                  | 188       | Tumor                | Lymph node       | Male   | Adult     |               |     |      |      |     |     |     |      |      |       |     |                         | T-LBL                          |
|                  | 135       | Tumor                | Lymph node       | Male   | Adult     |               | +   |      | +    | +   | +   | +   | +    | +/-  | -     | +/- |                         | Medullar / Mature T-LBL        |
|                  | 154       | Tumor                | Lymph node       | Female | Pediatric | 80%           |     | -    | +    | -   | -   |     |      | -    | -     |     |                         | Immature T-LBL                 |
|                  | 685       | Tumor                | Mediastinum      | Male   | Adult     | 80%           | +   | -    | +    | +   | +   |     |      |      |       |     |                         | Cortical/Medullar Mature T-LBL |
|                  | 153       | Tumor                | Lymph node       | Male   | Adult     | 90%           | +   | +    | -    | +   | +   |     |      |      |       |     |                         | T-LBL                          |
|                  | 038       | Tumor                | Thymus           | Male   | Pediatric |               |     |      |      |     |     |     |      |      |       |     |                         | T-LBL                          |
|                  | 001       | Tumor                | Lymph node       | Male   | Pediatric |               | +   |      | +    | -   | -   |     |      |      |       |     |                         | PreT/ProT Immature T-LBL       |
|                  | 639       | Tumor                | Thymus           | Male   | Pediatric | 80%           | +   | -    | +    | -   | +/- |     |      | -    | -     | -   | -                       | Medullar / Mature T-LBL        |
|                  | 402       | Control              | Fetal thymus     |        |           |               |     |      |      |     |     |     |      |      |       |     |                         |                                |
|                  | 403       | Control              | Fetal thymus     |        |           |               |     |      |      |     |     |     |      |      |       |     |                         |                                |
|                  | 892       | Control              | Pediatric thymus |        |           |               |     |      |      |     |     |     |      |      |       |     |                         |                                |
|                  | 601       | Control              | Pediatric thymus |        |           |               |     |      |      |     |     |     |      |      |       |     |                         |                                |
| 030717           | Control   | Pediatric thymocytes |                  |        |           |               |     |      |      |     |     |     |      |      |       |     |                         |                                |
| 120717           | Control   | Pediatric thymocytes |                  |        |           |               |     |      |      |     |     |     |      |      |       |     |                         |                                |

ic, intra-cytoplasmic

**Supplementary Table S4.****Primer sequences RT-PCR and for Sanger DNA sequencing**

| Target gene                | Primer sequences (5'-3') | Size (bp) |
|----------------------------|--------------------------|-----------|
| TFG-ADGRG7 <sup>1</sup>    | ATGAACGGACAGTTGGATCTAA   | 421       |
|                            | AAGTAAAACCCATATAGGTACTAT |           |
| JAK3-INL3                  | GCTCTTACCTACTGCGACA      | 228       |
|                            | AGGTCCCAGCGTGAGATTAC     |           |
| KANSL1-ARL17A <sup>2</sup> | AGTGGCATAGCCAATTGAG      | 399       |
|                            | CTTCTGGCACCTTTTGTT       |           |
| RIC3-TRBC2 <sup>2</sup>    | CGTACTCCACAGTGACAGAGA    | 429       |
|                            | AGAGCCCGTAGAACTGGACT     |           |
| ZMYM2-FGFR1 <sup>3</sup>   | TCCTGTGCCTGTGTATATCCC    | 204       |
|                            | GAGGGTCTTCGGGAAGCTCATA   |           |
| COMMD3-BMI1-TRBJ2          | AAAAGCGATCGGTCTTAAAT     | 152       |
|                            | GTCCCTGGCCCAAGAAC        |           |
| CLN6-CALML4                | CGGCTGCTTACTGCCTCTA      | 219       |
|                            | ACGCCATGACGTAACCTTC      |           |
| GXLYT2-PPP4R2              | GAGGCGCTACCATGACGAT      | 248       |
|                            | TAGGGTTGGGAGGACCTCTT     |           |
| XPO7-NPM2                  | CCATGCACCTGTGTTTGAG      | 242       |
|                            | GGCTGCATCTTCTTGCTCCT     |           |
| DNAJC4-VEGFB               | CCTTCAGGAAGTGAAGCAG      | 217       |
|                            | CATGAGCTCCACAGTCAAGG     |           |
| UTP6-COPRS                 | AAGGAGCAAGAATCCTGCAA     | 188       |
|                            | GGCAGGACTGCTATTAGGA      |           |
| TUT1-EEF1G                 | CTGGAGCCAGCATAAATGT      | 216       |
|                            | AGAACGCTGAACGCAATCT      |           |
| OPN3-CHML                  | CACCTCTCTGCTCAACAT       | 184       |
|                            | TTGTCCCATTTTAGGAAG       |           |
| KANSL1-LRRC37A             | TGACCTGGTCTCTGTGTC       | 182       |
|                            | GACTAGCGTTGTTCCCATGTC    |           |
| SAV1-GYPE                  | GGAGACTCTGGTCCCAGATA     | 197       |
|                            | GCCACACCAGTGGTACTTGA     |           |
| GALT-IL11RA                | CTGTCCGAAATTCATGGTT      | 226       |
|                            | GCAGTCACTCCAGGACAACA     |           |
| DNAAF3-TNNI3               | AATCAGCTCTGGGCAACACT     | 214       |
|                            | CGTTTGGAGGTCAGTGAG       |           |
| SSSCA1-FAM89B              | CCTCTCCAAGACAACAGC       | 178       |
|                            | CTTCCCAGCTCCTCAGACT      |           |
| KANSL1-ARL17B              | TCGAATTCGTGAGCAACAG      | 226       |
|                            | CATCATTTGTGCCAGTGACC     |           |
| GPC2-GAL3ST4               | ACTGGGACACGACCTGGAC      | 211       |
|                            | GGAAAGGTGAGGTGACAGAG     |           |
| GAL3ST4-C7orf43            | TCCCTAGAGGGGCAAAAGAT     | 105       |
|                            | ACGGTGAGTGGGAAGATGAC     |           |
| DPP6;ACTR3B                | CTGGCAAGATCAACACCTC      | 250       |
|                            | CAGTGTTCCTGCGTAGC        |           |
| SNX29;PLA2G10              | GTCTTTGAACGGGAGTTTG      | 214       |
|                            | GGAGTAGCGCTCTGCTTGG      |           |
| BPTF-LRRC37A2              | CAGTTACTGCACGGAAAGCA     | 114       |
|                            | CGGGCTTGTAACACCTTCAT     |           |
| SPN-QPRT                   | CCCTTCCATCTCCAAGAG       | 216       |
|                            | ACCAAGGCTGCGTAGTTGAG     |           |
| NFYC-TAL1                  | GTTCTCCGTGACGCACACT      | 185       |
|                            | GGGGAAGGTCTCCTTTCAC      |           |
| PTCRA-CNPY3                | CTGAGGGTCACAGCAGGAGT     | 125       |
|                            | AAAGGTGACTTCAGCTCCA      |           |
| PPRC1-NOLC1                | GCCCTTTGATCTGCTTTG       | 125       |
|                            | GCCTGTAACCTTCGCTCTGG     |           |
| KANSL1-LRRC37A2            | TGACCTGGTCTCTGTGTC       | 182       |
|                            | GACTAGCGTTGTTCCCATGTC    |           |
| DTX2-UPK3B                 | GCCAGTGTACCTCCAGAC       | 117       |
|                            | ATGTAGTGGCCATCGGTGAG     |           |

**Primer sequences for Sanger DNA sequencing**

| Target Gene                | Sequence 5'-3'         | Size |
|----------------------------|------------------------|------|
| KANSL1-ARL17A <sup>2</sup> | TCATCCACAGGAGTCACTTAGG | 517  |
|                            | AAGTTCAGTTCGGCTGG      |      |

**References:**

- Chase A, Ernst T, Fiebig A, Collins A, Grand F, Erben P, Reiter A, Schreiber S, Cross NC. TFG, a target of chromosome translocations in lymphoma and soft tissue tumors, fuses to GPR128 in healthy individuals. *Haematologica* 2010;95: 20-6.
- Atak ZK, Gianfelici V, Hulselmans G, De Keersmaecker K, Devasia AG, Geerdens E, Mentens N, Chiaretti S, Durinck K, Uyttebroeck A, Vandenberghe P, Wlodarska I, et al. Comprehensive analysis of transcriptome variation uncovers known and novel driver events in T-cell acute lymphoblastic leukemia. *PLoS Genet* 2013;9: e1003997.
- Buijs A, van Wijnen M, van den Blink D, van Gijn M, Klein SK. A ZMYM2-FGFR1 8p11 myeloproliferative neoplasm with a novel nonsense RUNX1 mutation and tumor lysis upon imatinib treatment. *Cancer Genet* 2013;206: 140-4.



Supplementary Table S7

| <b>Sample</b> | <b>Number of total reads sequenced per sample</b> | <b>Overall read mapping rate reported by TopHat</b> |
|---------------|---------------------------------------------------|-----------------------------------------------------|
| 554           | 118840916                                         | 96,40%                                              |
| 840           | 94003166                                          | 94,80%                                              |
| 408           | 88383136                                          | 95,20%                                              |
| 405           | 66730772                                          | 94,90%                                              |
| 404           | 50250596                                          | 94,90%                                              |
| 346           | 57983356                                          | 93,40%                                              |
| 460           | 66188320                                          | 94,80%                                              |
| 238           | 108761560                                         | 95,20%                                              |
| 521           | 64960498                                          | 95,50%                                              |
| 192           | 42618380                                          | 93,80%                                              |

**Supplementary Figure S1.A-**

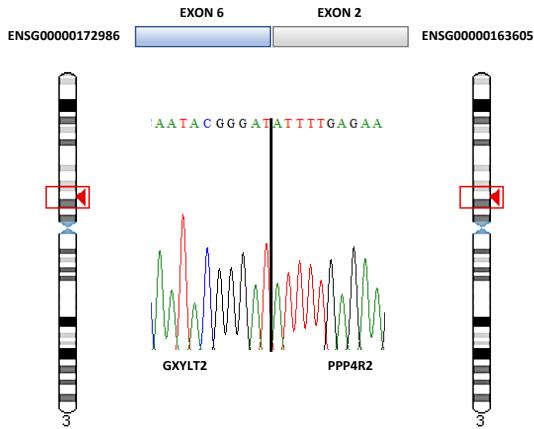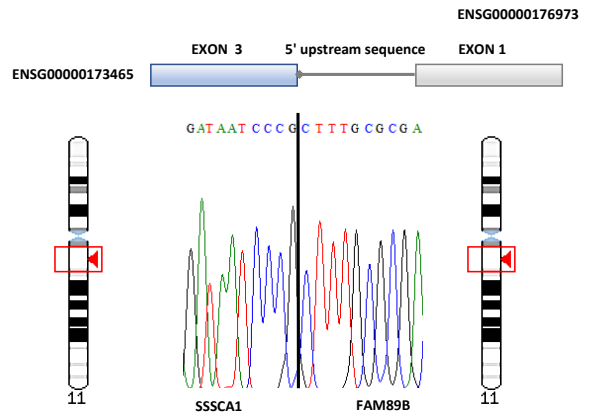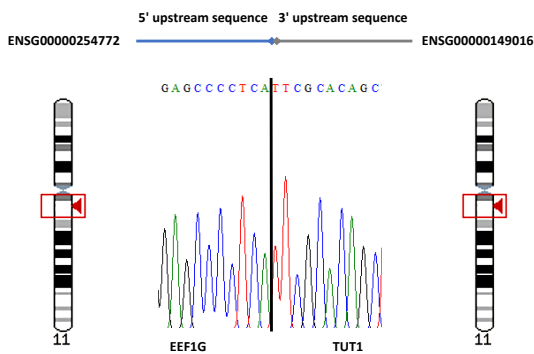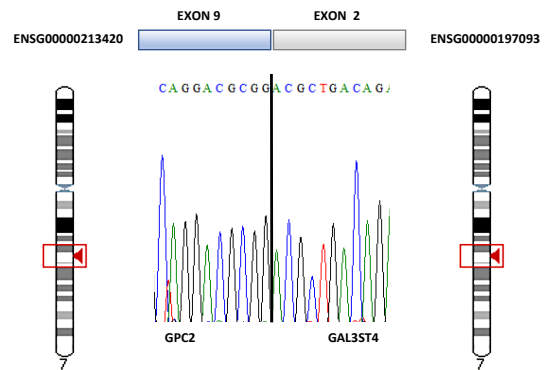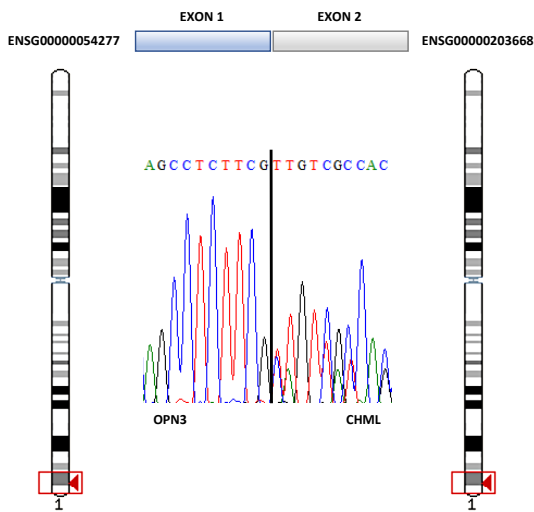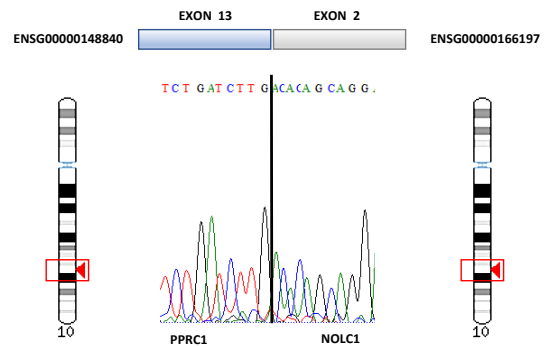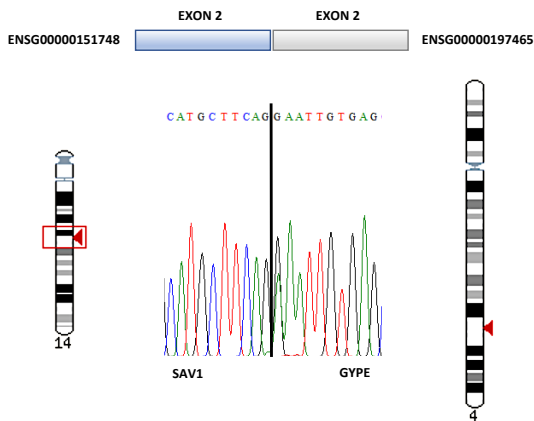

**Supplementary Figure S1.B-**

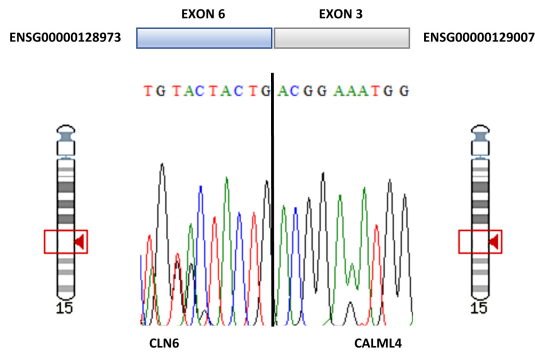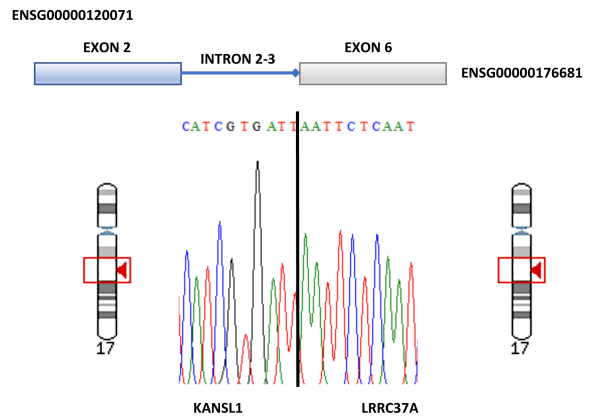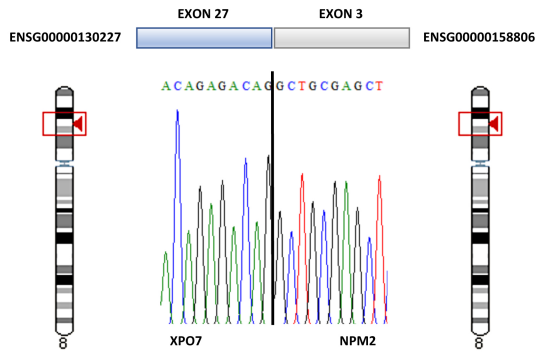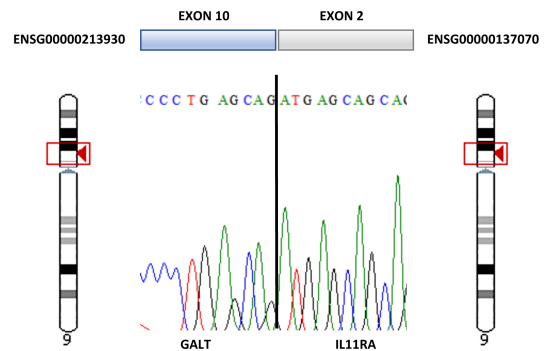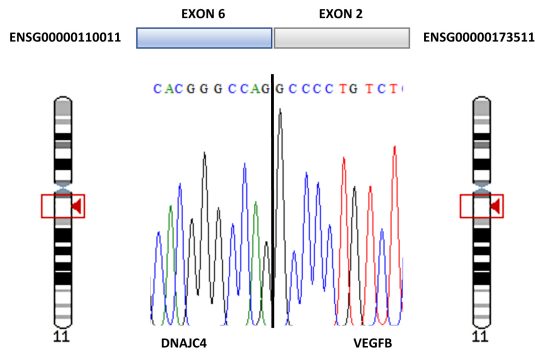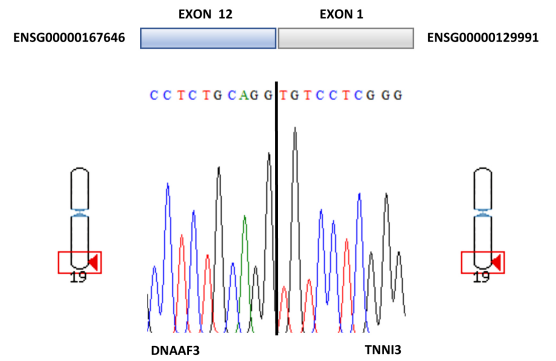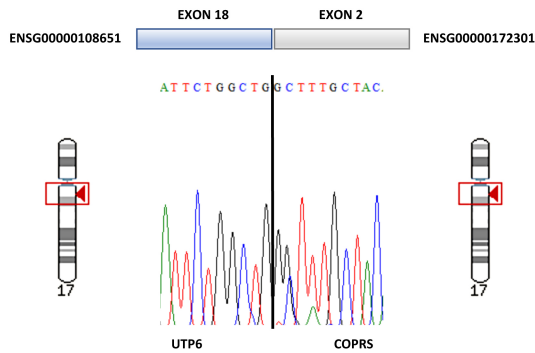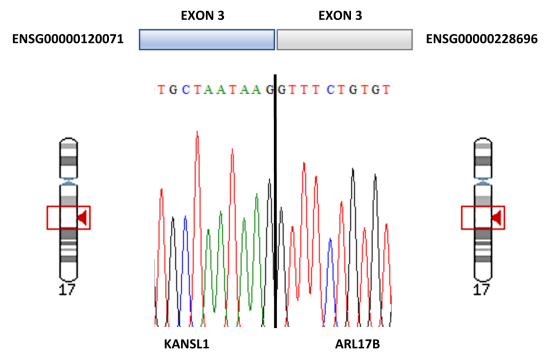

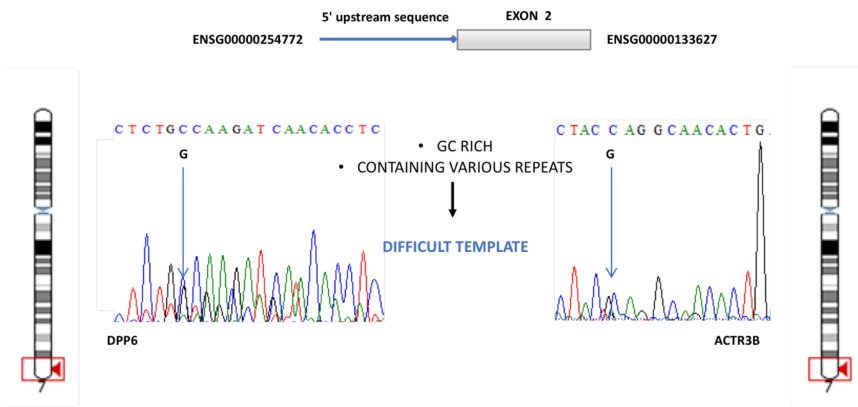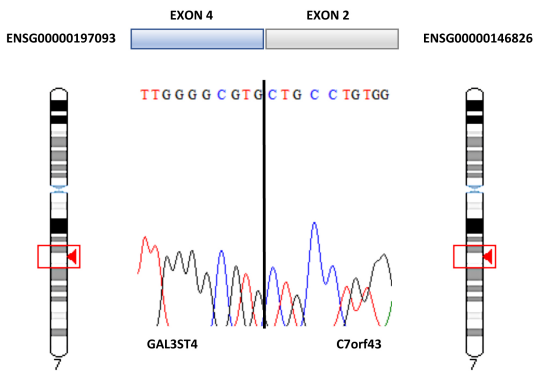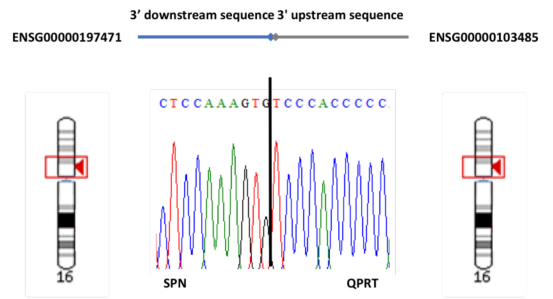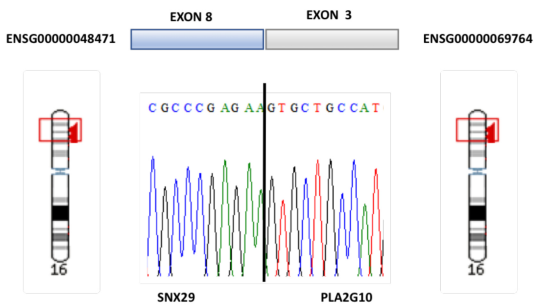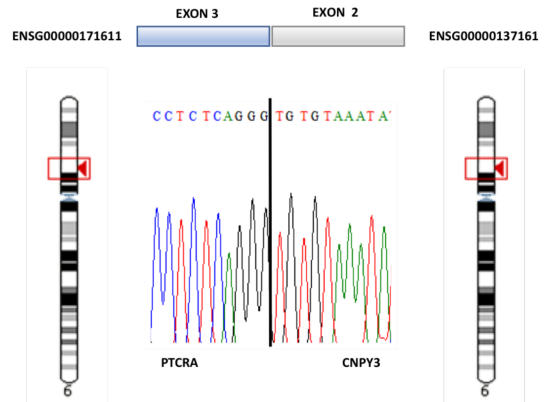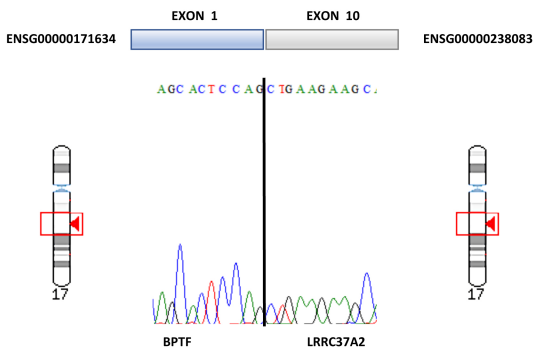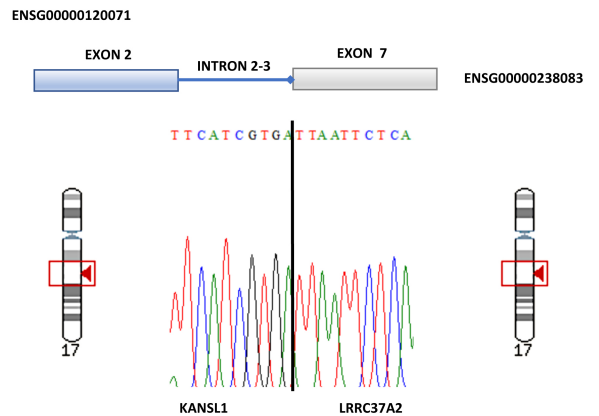



ENSG00000091073      EXON 11      EXON 3      ENSG00000243566

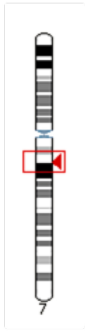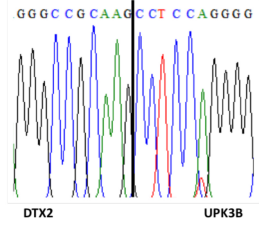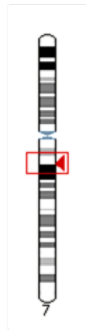

## Supplementary Figure S2

### Human JAK3 ENST00000458235.1 3' UTR length: 1959

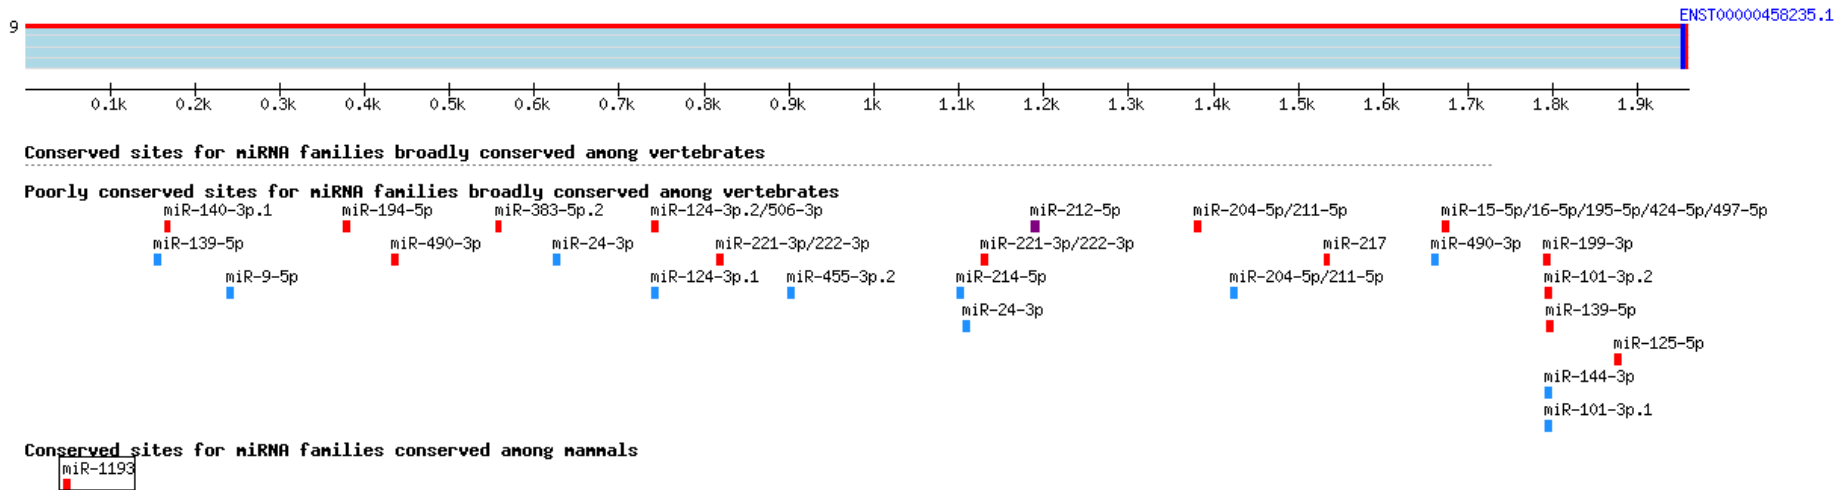

### Human INSL3 ENST00000317306.7 3' UTR length: 342

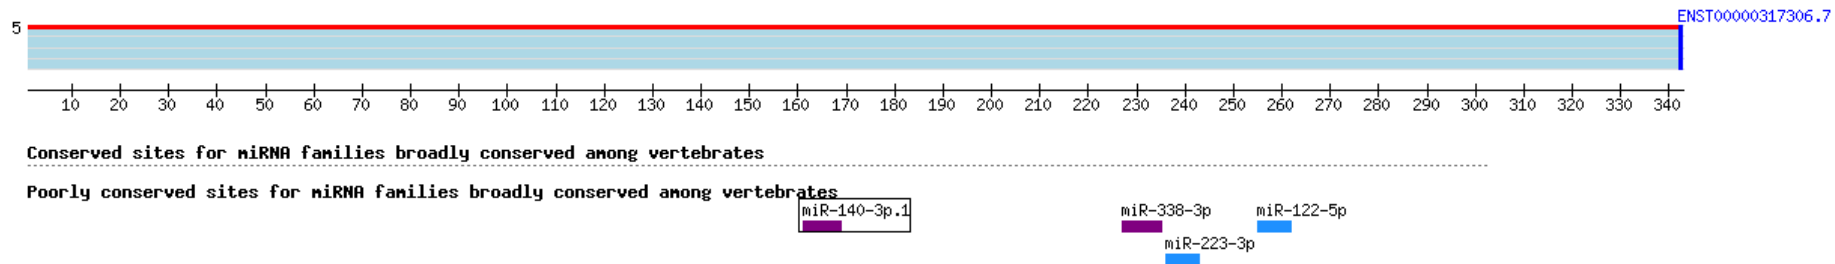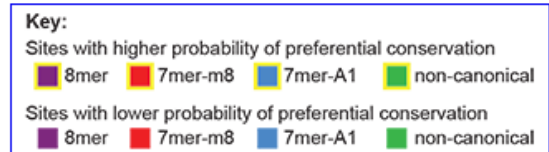

Supplement: 41598_2019_41675_MOESM1_ESM.pdf [file 41598_2019_41675_MOESM1_ESM.pdf]
